# Supplementary material for: Comparative Transcriptome Analysis Identified Potential Genes and Transcription Factors for Flower Coloration in Kenaf (Hibiscus cannabinus L.)
Source: MDPI journal article supplement (doi:10.3390/agronomy13030715), 2023-02-27
Supplement: s1 [file s1]

**Table S2.** List of primers used for validation of DEGs results by qRT-PCR.

| Putative Genes          | Transcript ID            | Forward Primer (5'-3') | Reverse Primer (3'-5') | PCR product size |
|-------------------------|--------------------------|------------------------|------------------------|------------------|
| <i>CHS</i>              | TRINITY_DN2412_c0_g2_i2  | TCCAGTGAAGGTGCCATGTA   | TCAAAGCGCCTATCCTGACT   | 157              |
| <i>F3'H</i>             | TRINITY_DN12895_c0_g4_i1 | CACTAACATGGGTGCCACAG   | GGAATGGGCAATTTCAGAGA   | 190              |
| <i>FSL2</i>             | TRINITY_DN2539_c0_g1_i1  | TTTACGAGCGTGAGACATCG   | CGGAGTTTGAAGAGGTCGAG   | 178              |
| <i>DFR</i>              | TRINITY_DN269_c0_g3_i1   | GCGGCTATCCAAGGATGTAA   | CCATCACGTCGACTTTCTCA   | 202              |
| <i>ANS</i>              | TRINITY_DN14944_c0_g1_i1 | TGGTCCTGTGAAGCACACTC   | CATACTGGTGCCGAATGATG   | 209              |
| <i>UGT73B2</i>          | TRINITY_DN12056_c0_g1_i1 | CAACTTGGTCCGATGTTGTG   | GATTCTCAAGCGCCAAACTC   | 216              |
| <i>5MAT</i>             | TRINITY_DN6647_c0_g1_i1  | AAGGCACATGTGACCACAAA   | TGGGTGTCATCCTGTGAGAA   | 178              |
| <i>UF3GT</i>            | TRINITY_DN21246_c0_g2_i1 | GCAAGCTAGGCATCAAGTCC   | CTTTGTTGTCACGGCAGCTA   | 208              |
| <i>GST26</i>            | TRINITY_DN5008_c0_g1_i8  | CGTTGCTCGTAGATGTCGAA   | CTCGAAGTGGAAGCACACAA   | 155              |
| <i>UGT75C1</i>          | TRINITY_DN6166_c0_g3_i1  | CTTTAGCGTCGGATTCTTCG   | TCCGCCATTAAAGACCAAAC   | 176              |
| <i>TT12</i>             | TRINITY_DN6803_c0_g2_i7  | TCACCATCATCTTGCTCTGC   | ACTCAACCGCTTTGCTCCTA   | 247              |
| <i>RNS1</i>             | TRINITY_DN1095_c0_g1_i5  | GGTTCGATTCCTGCATTTGT   | ACGACGGAATCAAGTTCTGG   | 216              |
| <i>ACT7<sup>a</sup></i> | HcActin7                 | TTGCAGACCGTATGAGCAAG   | ATCCTCCGATCCAGACACTG   | 166              |

<sup>a</sup> Reference genes for normalization of gene expression in kenaf reported by Niu et al. (2017).
