# Supplementary figures and images for: Comparative Transcriptome Analysis Identified Potential Genes and Transcription Factors for Flower Coloration in Kenaf (Hibiscus cannabinus L.)
Source: MDPI journal article supplement (doi:10.3390/agronomy13030715), 2023-02-27

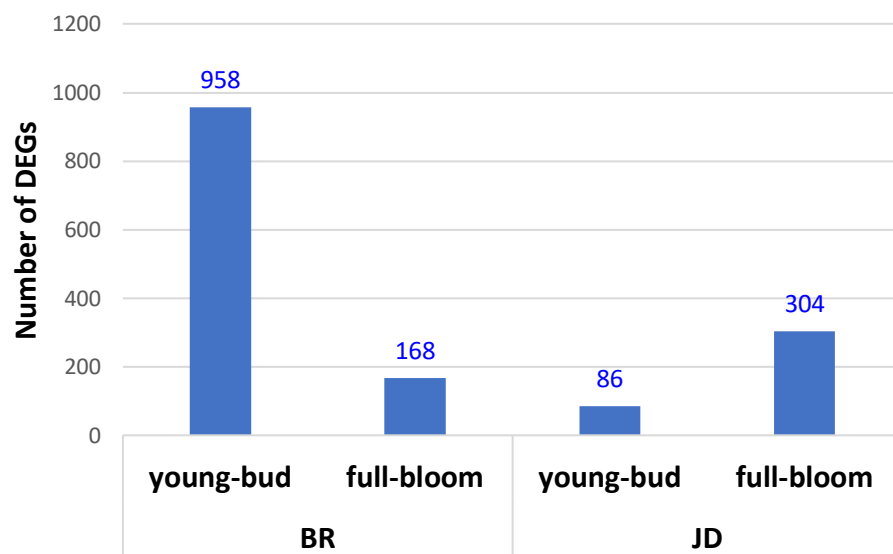

**Figure S1.** Comparison of the DEGs in the BR and JD compared with BM.

Supplement: s1 [file s1]
